# Supplementary material for: Phosphole-based π-conjugated electroluminescent materials for OLEDs
Source: Royal Society of Chemistry journal article supplement (doi:10.1039/c0nj00122h), 2010-01-01
Supplement: c0nj00122h.pdf [file c0nj00122h.pdf]

## Phosphole-based $\pi$ -conjugated materials for OLEDs

Damien Joly, Denis Tondelier, Valérie Deborde, Bernard Geoffroy, Muriel Hissler, and Régis Réau

**Table S1.** Crystal data and structure refinement for derivative **3b** after the ‘squeeze’ treatment.

|                                        |                                         |
|----------------------------------------|-----------------------------------------|
| molecular formula                      | C <sub>44</sub> H <sub>39</sub> Au Cl P |
| molecular weight, g/mol                | 831.14                                  |
| a, Å                                   | 11.2536(9)                              |
| b, Å                                   | 25.600(3)                               |
| c, Å                                   | 13.7924(14)                             |
| a, deg                                 | 90                                      |
| b, deg                                 | 98.022(3)                               |
| g, deg                                 | 90                                      |
| V, Å <sup>3</sup>                      | 3934.6(7)                               |
| Z                                      | 4                                       |
| D <sub>calc</sub> , g cm <sup>-3</sup> | 1.403                                   |
| crystal system                         | Monoclinic                              |
| space group                            | P2 <sub>1</sub> /n                      |
| T, K                                   | 100(2)                                  |
| wavelength Mo Ka, Å                    | 0.71073                                 |
| m, mm <sup>-1</sup>                    | 3.875                                   |
| F(000)                                 | 1656                                    |
| $\theta$ limit, deg                    | 1.59 - 26.56                            |
| no. reflns collected                   | 31372                                   |
| no. ind reflns                         | 8060                                    |
| reflections [I > 2s(I)]                | 6332                                    |
| data/restraints/parameters             | 8060 / 0 / 424                          |
| GOF on F <sup>2</sup>                  | 1.036                                   |
| final R indices                        | R1 = 0.0461                             |
| [I > 2s(I)]                            | wR2 = 0.1266                            |
| largest diff peak                      | 2.284                                   |
| and hole (e Å <sup>-3</sup> )          | 2.284 -2.328                            |

**Table S2.** Crystal data and structure refinement for derivative **3b** before the ‘squeeze’ treatment.

|                                                    |                  |
|----------------------------------------------------|------------------|
| molecular formula                                  | C45 H41 Au Cl3 P |
| molecular weight,<br>g/mol                         | 916.06           |
| $\alpha$ , Å                                       | 11.2536(9)       |
| $\beta$ , Å                                        | 25.600(3)        |
| $\chi$ , Å                                         | 13.7924(14)      |
| $\alpha$ , deg                                     | 90               |
| $\beta$ , deg                                      | 98.022(3)        |
| $\gamma$ , deg                                     | 90               |
| V, Å <sup>3</sup>                                  | 3934.6(7)        |
| Z                                                  | 4                |
| D <sub>calc</sub> , g cm <sup>-3</sup>             | 1.543            |
| crystal system                                     | Monoclinic       |
| space group                                        | P21/n            |
| T, K                                               | 100(2)           |
| wavelength Mo Ka, Å                                | 0.71073          |
| $\mu$ , mm <sup>-1</sup>                           | 4.014            |
| F(000)                                             | 1824             |
| $\theta$ limit, deg                                | 1.59 - 26.56     |
| no. reflns collected                               | 31372            |
| no. ind reflns                                     | 8060             |
| reflections [I > 2 $\sigma$ (I)]                   | 6323             |
| data/restraints/parameters                         | 8060 / 0 / 469   |
| GOF on F <sup>2</sup>                              | 1.092            |
| final R indices                                    | R1 = 0.0524      |
| [I > 2 $\sigma$ (I)]                               | wR2 = 0.1347     |
| largest diff peak<br>and hole (e Å <sup>-3</sup> ) | 2.175<br>-2.430  |

**Table S3** : Electrochemical data for **3a,b**, **4a,b** and **R<sub>AuCl</sub>/Rs** (vs. SCE)

| Compounds | $E_{ox}/V^a$ | $E_{ox}^{onset}/V$ | $E_{red}/V^a$ | $E_{red}^{onset}/V$ | HOMO/eV <sup>b</sup> | LUMO/eV <sup>c</sup> | DE <sup>El</sup> /eV <sup>d</sup> |
|-----------|--------------|--------------------|---------------|---------------------|----------------------|----------------------|-----------------------------------|
| <b>3a</b> | + 1.47       | + 1.26             | -1.55         | - 1.47              | - 5.66               | - 2.93               | 2.73                              |
| <b>3b</b> | + 1.37       | + 1.28             | -1.58         | - 1.51              | - 5.68               | - 2.89               | 2.79                              |
| <b>4a</b> | + 1.38       | + 1.18             | -1.60         | - 1.47              | - 5.58               | - 2.93               | 2.65                              |
| <b>4b</b> | + 1.32       | + 1.12             | -1.56         | - 1.52              | - 5.52               | - 2.88               | 2.64                              |
| <b>A</b>  | + 1.95       | + 1.40             | -1.64         | - 1.60              | - 5.80               | - 2.80               | 3.00                              |
| <b>B</b>  | + 1.62       | + 1.37             | -1.58         | - 1.61              | - 5.77               | - 2.79               | 2.98                              |

<sup>a</sup>All potentials were obtained during cyclic voltametric investigations in 0.2 M Bu<sub>4</sub>NPF<sub>6</sub> in CH<sub>2</sub>Cl<sub>2</sub>. Platinum electrode diameter 1 mm, sweep rate: 200 mV s<sup>-1</sup>. <sup>b</sup> Calculated from the onset oxidation potential  $E_{ox}^{onset}/V$ . <sup>c</sup> Calculated from the onset reduction potential  $E_{red}^{onset}/V$ . <sup>d</sup> Calculated as DE<sup>El</sup> = HOMO-LUMO from the redox data.

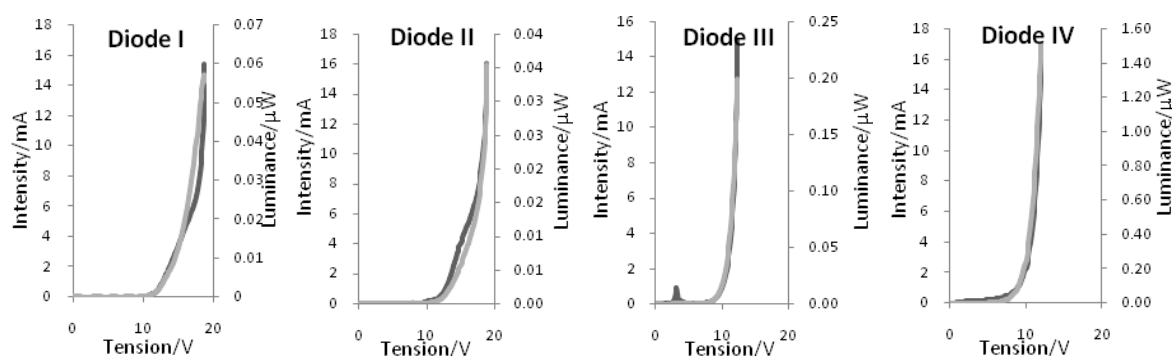

**Figure S1** I-V-L characteristics of diodes I-IV.

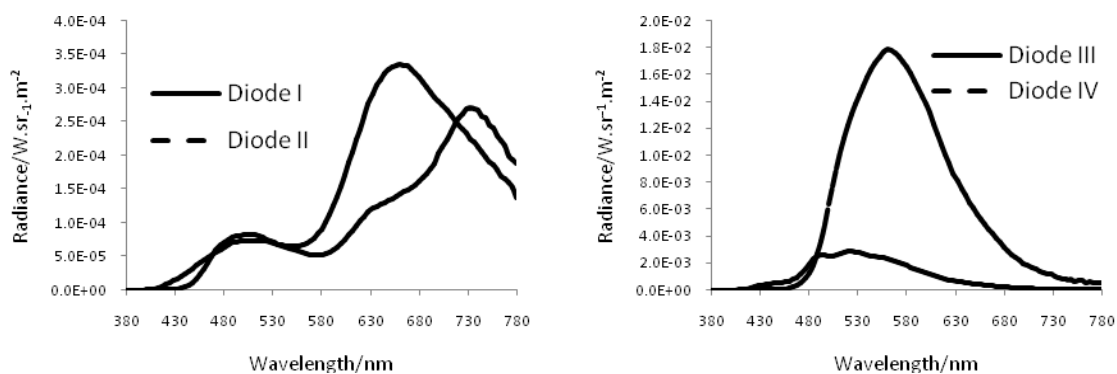

**Figure S2** EL spectra of the devices I-IV recorded at 30 mA/cm<sup>2</sup>.

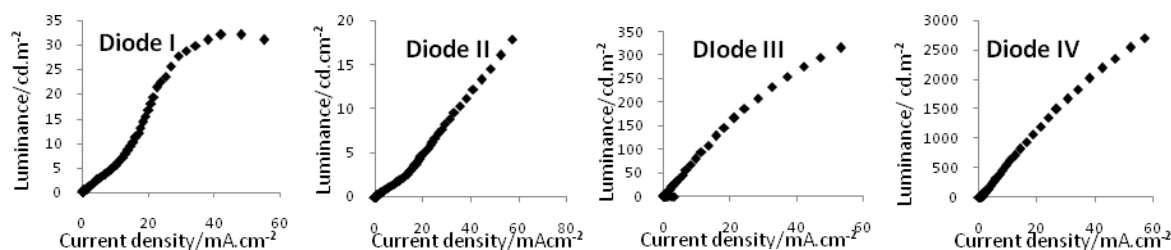

**Figure S3** Luminance-current density characteristics of diodes I-IV

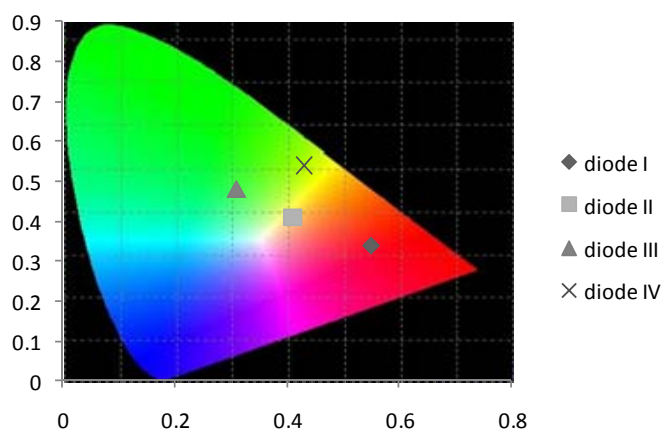

**Figure S4** CIE coordinates of diodes I-IV.

| Compounds | Diodes     |   | $B_1^a/\text{cd.m}^{-2}$ | $B_1^b/\text{cd.m}^{-2}$ |
|-----------|------------|---|--------------------------|--------------------------|
| <b>4a</b> | <b>III</b> | 1 | 28.4                     | 21.1                     |
|           |            | 2 | 23.6                     | 17.0                     |
|           |            | 3 | 26.2                     | 20.6                     |
| <b>4b</b> | <b>IV</b>  | 1 | 120.1                    | 114.3                    |
|           |            | 2 | 118.9                    | 110.5                    |
|           |            | 3 | 109.4                    | 97.6                     |

<sup>a</sup> brightness at 1 mA, measured before IVL measurement; <sup>b</sup> brightness at 1 mA, measured after IVL measurement

**Figure S5** Measurements of the Brightness at 1 mA before and after IVL Characterizations
